# Supplementary material
Source: Royal Society of Chemistry journal article supplement (doi:10.1039/d6py00508j)
Supplement: d6py00508j1.pdf [file d6py00508j1.pdf]

## Supporting Information

### A cleavage-type pyrrolyl enone photoinitiator enables photobleaching-regulated uniform thick-film photopolymerization

Jingfang Li<sup>a,\*</sup>, Wangwang Zhou<sup>b</sup>, Siqin Zhou<sup>a</sup>, Luran Chun<sup>a</sup>, Yuxuan Tang<sup>a</sup>, Xiangqi Xu<sup>a</sup>, Zhiceng Fu<sup>b,\*</sup>

a. School of Electronic Science and Engineering, Chongqing University of Posts and Telecommunications, Chongqing 400065, China.

b. Department of Chemistry, College of Science, Xihua University, Chengdu 610039, China.

E-mail: [lijf@cqupt.edu.cn](mailto:lijf@cqupt.edu.cn)

E-mail: [zcfu@mail.xhu.edu.cn](mailto:zcfu@mail.xhu.edu.cn)

#### 1. <sup>1</sup>H NMR spectrum of DPP

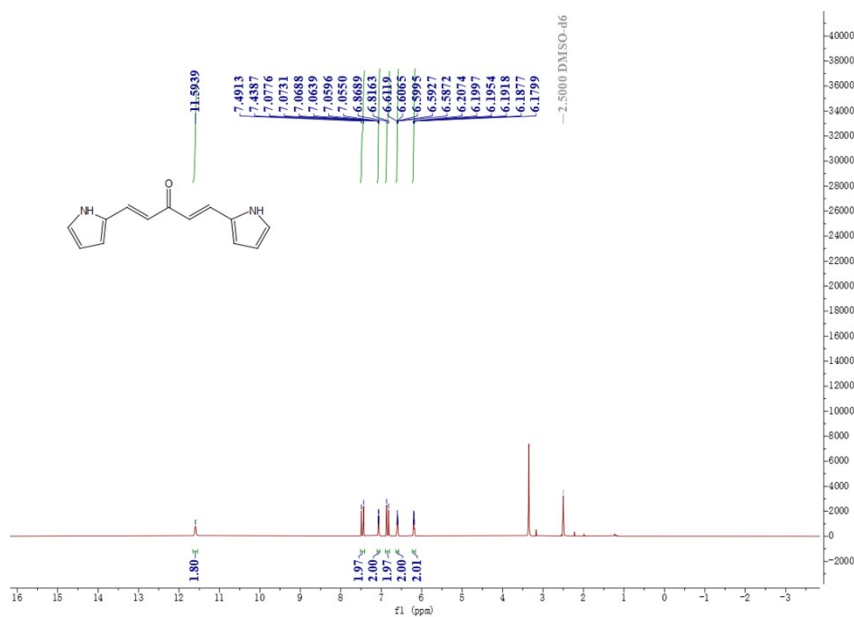

Fig.S1 <sup>1</sup>H NMR spectrum of DPP dissolved in DMSO-*d*<sub>6</sub>.

## 2. $^1\text{H}$ NMR spectrum of C7-DPP-C7

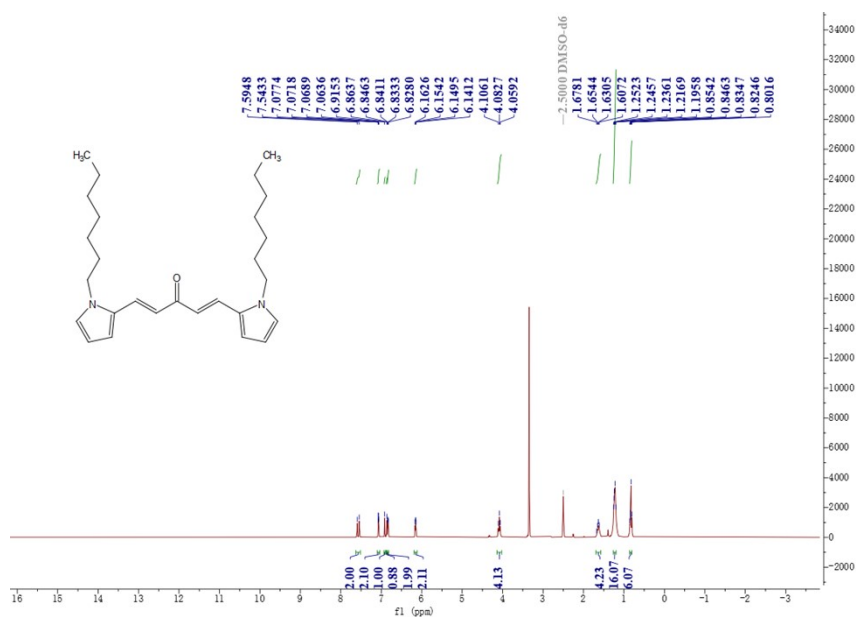

Fig.S2  $^1\text{H}$  NMR spectrum of C7-DPP-C7 dissolved in DMSO- $d_6$ .

## 3. $^{13}\text{C}$ NMR spectrum of C7-DPP-C7

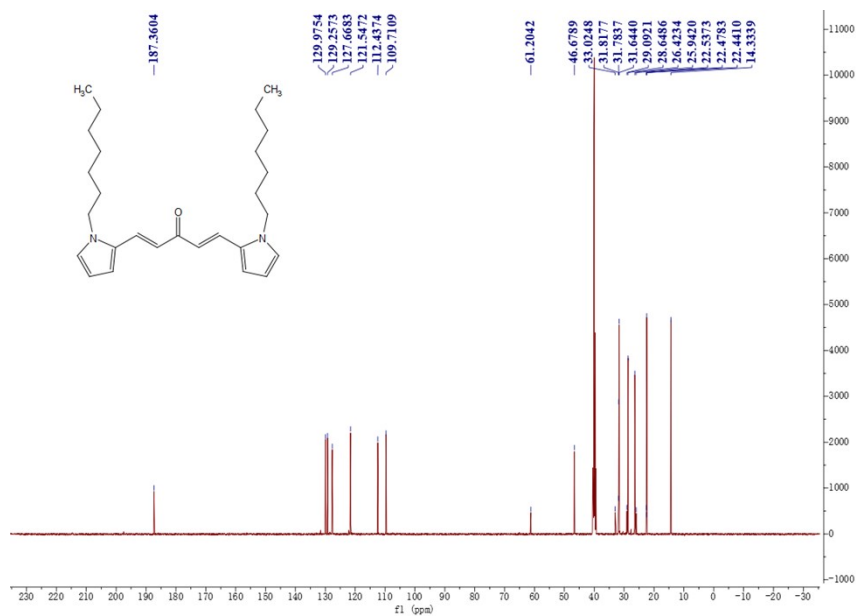

Fig.S3  $^{13}\text{C}$  NMR spectrum of C7-DPP-C7 dissolved in DMSO- $d_6$ .

#### 4. HRMS spectrum

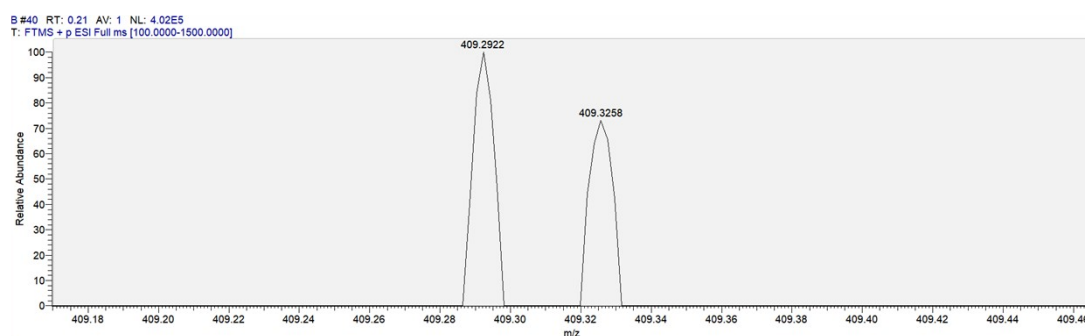

Fig.S4 HRMS spectrum of C7-DPP-C7.

#### 5. HPLC-MS spectrum

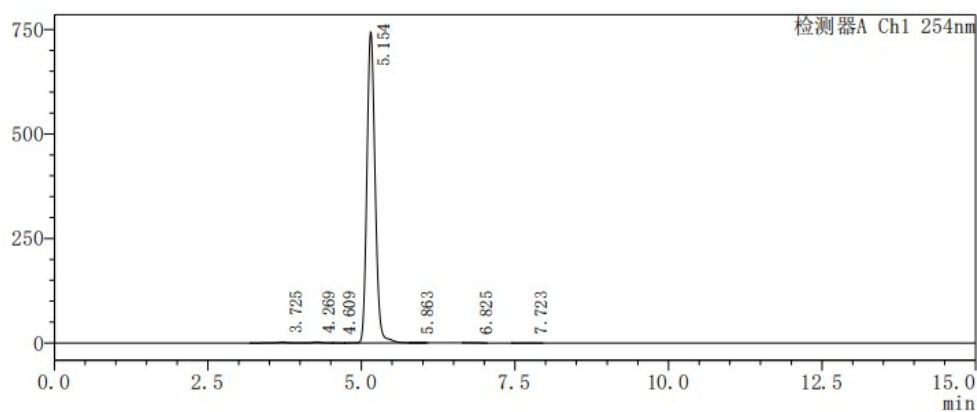

Fig.S5 HPLC-MS spectrum of C7-DPP-C7.

#### 6. Photolysis experiments

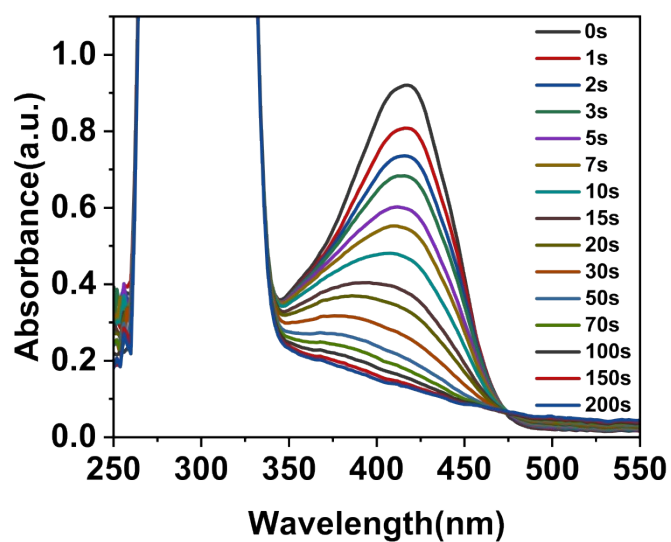

Fig.S6 Photolysis spectra of C7-DPP-C7 with coinitiator EDB under LED@405nm irradiation.

## 7. Theoretically Calculated Cartesian Coordinates of C7-DPP-C7

**Table.1** Cartesian coordinates of the molecule C7-DPP-C7 (optimized at the B3LYP/6-31G(d,p) level in acetonitrile using the PCM solvent model).

| Center Number | Atomic Number | Atomic Type | Coordinates (Angstroms) |           |           |
|---------------|---------------|-------------|-------------------------|-----------|-----------|
|               |               |             | X                       | Y         | Z         |
| 1             | 6             | 0           | 6.218164                | -2.648049 | 0.257115  |
| 2             | 6             | 0           | 3.975133                | -2.654640 | 0.113973  |
| 3             | 6             | 0           | 5.784746                | -3.867462 | 0.761659  |
| 4             | 6             | 0           | 2.666393                | -2.159546 | -0.195898 |
| 5             | 6             | 0           | 1.484329                | -2.786852 | 0.031108  |
| 6             | 6             | 0           | 0.208584                | -2.159085 | -0.347338 |
| 7             | 6             | 0           | -1.003631               | -2.938265 | -0.050291 |
| 8             | 8             | 0           | 0.157806                | -1.036692 | -0.885751 |
| 9             | 6             | 0           | -2.235838               | -2.457806 | -0.355543 |
| 10            | 6             | 0           | -3.491655               | -3.110404 | -0.129378 |
| 11            | 6             | 0           | -5.722934               | -3.380717 | -0.133129 |
| 12            | 6             | 0           | -5.176643               | -4.538742 | 0.405309  |
| 13            | 1             | 0           | 7.216770                | -2.249900 | 0.148106  |
| 14            | 1             | 0           | 3.716713                | -4.674808 | 0.965724  |
| 15            | 1             | 0           | 6.420167                | -4.656381 | 1.138541  |
| 16            | 1             | 0           | 2.593092                | -1.180183 | -0.664058 |
| 17            | 1             | 0           | 1.448635                | -3.767176 | 0.498513  |
| 18            | 1             | 0           | -0.879913               | -3.909333 | 0.421480  |
| 19            | 1             | 0           | -2.251679               | -1.474451 | -0.821007 |
| 20            | 1             | 0           | -6.753677               | -3.108743 | -0.309784 |
| 21            | 1             | 0           | -5.733394               | -5.400927 | 0.744216  |
| 22            | 1             | 0           | -3.042745               | -5.085358 | 0.748632  |
| 23            | 7             | 0           | -4.714159               | -2.523156 | -0.460585 |
| 24            | 7             | 0           | 5.134989                | -1.919522 | -0.138010 |
| 25            | 6             | 0           | -3.780236               | -4.371863 | 0.407985  |
| 26            | 6             | 0           | 4.381210                | -3.873899 | 0.672406  |
| 27            | 6             | 0           | -4.927550               | -1.173373 | -0.988188 |
| 28            | 1             | 0           | -4.168353               | -0.970585 | -1.748793 |
| 29            | 1             | 0           | -5.892806               | -1.181784 | -1.501963 |
| 30            | 6             | 0           | -4.914311               | -0.086643 | 0.094374  |
| 31            | 1             | 0           | -3.947730               | -0.102171 | 0.612799  |
| 32            | 1             | 0           | -5.677633               | -0.327514 | 0.844765  |
| 33            | 6             | 0           | -5.171255               | 1.309674  | -0.484628 |
| 34            | 1             | 0           | -6.136425               | 1.314010  | -1.010179 |
| 35            | 1             | 0           | -4.408705               | 1.535748  | -1.242953 |
| 36            | 6             | 0           | -5.169246               | 2.412865  | 0.580913  |
| 37            | 1             | 0           | -4.204054               | 2.406605  | 1.106609  |
| 38            | 1             | 0           | -5.931072               | 2.184551  | 1.339579  |
| 39            | 6             | 0           | -5.426292               | 3.812453  | 0.009664  |
| 40            | 1             | 0           | -6.391006               | 3.818146  | -0.517752 |
| 41            | 1             | 0           | -4.664064               | 4.040892  | -0.749022 |

|    |   |   |           |           |           |
|----|---|---|-----------|-----------|-----------|
| 42 | 6 | 0 | -5.426417 | 4.917377  | 1.073286  |
| 43 | 1 | 0 | -4.462484 | 4.911441  | 1.600113  |
| 44 | 1 | 0 | -6.188016 | 4.688767  | 1.831244  |
| 45 | 6 | 0 | -5.683812 | 6.312457  | 0.495659  |
| 46 | 1 | 0 | -6.656343 | 6.358976  | -0.007796 |
| 47 | 1 | 0 | -5.677775 | 7.077826  | 1.278743  |
| 48 | 1 | 0 | -4.918168 | 6.583312  | -0.240441 |
| 49 | 6 | 0 | 5.214351  | -0.550803 | -0.653892 |
| 50 | 1 | 0 | 6.205002  | -0.437563 | -1.102878 |
| 51 | 1 | 0 | 4.487464  | -0.438894 | -1.463361 |
| 52 | 6 | 0 | 4.995848  | 0.519964  | 0.422590  |
| 53 | 1 | 0 | 4.006800  | 0.381522  | 0.876487  |
| 54 | 1 | 0 | 5.732245  | 0.371630  | 1.222348  |
| 55 | 6 | 0 | 5.114058  | 1.940905  | -0.141986 |
| 56 | 1 | 0 | 6.106853  | 2.071506  | -0.595538 |
| 57 | 1 | 0 | 4.386562  | 2.065863  | -0.954147 |
| 58 | 6 | 0 | 4.900815  | 3.023449  | 0.925499  |
| 59 | 1 | 0 | 3.895162  | 2.913921  | 1.355664  |
| 60 | 1 | 0 | 5.604592  | 2.846170  | 1.749759  |
| 61 | 6 | 0 | 5.082832  | 4.464514  | 0.422417  |
| 62 | 1 | 0 | 5.053234  | 5.142840  | 1.286002  |
| 63 | 1 | 0 | 6.086998  | 4.572608  | -0.012577 |
| 64 | 6 | 0 | 4.036436  | 4.929288  | -0.600019 |
| 65 | 1 | 0 | 4.078758  | 4.294975  | -1.494173 |
| 66 | 1 | 0 | 3.032825  | 4.790257  | -0.174791 |
| 67 | 6 | 0 | 4.217711  | 6.393136  | -1.014019 |
| 68 | 1 | 0 | 5.201052  | 6.556214  | -1.470094 |
| 69 | 1 | 0 | 3.459097  | 6.701136  | -1.741117 |
| 70 | 1 | 0 | 4.141023  | 7.061540  | -0.148634 |

**Table.2** Cartesian coordinates of the photolysis product ethylene derivatives (optimized at the B3LYP/6-31G(d,p) level in acetonitrile using the PCM solvent model).

| Center<br>Number | Atomic<br>Number | Atomic<br>Type | Coordinates (Angstroms) |           |           |
|------------------|------------------|----------------|-------------------------|-----------|-----------|
|                  |                  |                | X                       | Y         | Z         |
| 1                | 6                | 0              | 2.393873                | -1.730630 | 0.000004  |
| 2                | 6                | 0              | 3.736019                | -2.064032 | 0.000001  |
| 3                | 6                | 0              | 4.458622                | -0.851740 | -0.000003 |
| 4                | 6                | 0              | 3.544241                | 0.202009  | -0.000002 |
| 5                | 7                | 0              | 2.270416                | -0.362588 | 0.000002  |
| 6                | 6                | 0              | 3.900690                | 1.608488  | -0.000005 |
| 7                | 6                | 0              | 3.162763                | 2.734037  | 0.000001  |
| 8                | 6                | 0              | 1.006383                | 0.384240  | 0.000004  |
| 9                | 6                | 0              | -0.245568               | -0.491903 | 0.000001  |
| 10               | 6                | 0              | -1.522694               | 0.359341  | 0.000002  |
| 11               | 6                | 0              | -2.804095               | -0.483119 | -0.000003 |
| 12               | 6                | 0              | -4.085828               | 0.358523  | 0.000004  |
| 13               | 6                | 0              | -5.369388               | -0.480857 | -0.000008 |
| 14               | 6                | 0              | -6.645623               | 0.366109  | 0.000002  |
| 15               | 1                | 0              | 1.525440                | -2.368896 | 0.000007  |
| 16               | 1                | 0              | 4.135166                | -3.068755 | 0.000001  |
| 17               | 1                | 0              | 5.533739                | -0.729111 | -0.000006 |
| 18               | 1                | 0              | 4.982899                | 1.736097  | -0.000012 |
| 19               | 1                | 0              | 3.660768                | 3.698177  | -0.000002 |
| 20               | 1                | 0              | 2.081132                | 2.756622  | 0.000009  |
| 21               | 1                | 0              | 0.992078                | 1.034481  | 0.881988  |
| 22               | 1                | 0              | 0.992079                | 1.034484  | -0.881978 |
| 23               | 1                | 0              | -0.243819               | -1.143929 | -0.881975 |
| 24               | 1                | 0              | -0.243820               | -1.143933 | 0.881974  |
| 25               | 1                | 0              | -1.521274               | 1.018659  | 0.878831  |
| 26               | 1                | 0              | -1.521272               | 1.018667  | -0.878820 |
| 27               | 1                | 0              | -2.803336               | -1.143755 | -0.878412 |
| 28               | 1                | 0              | -2.803336               | -1.143768 | 0.878394  |
| 29               | 1                | 0              | -4.086256               | 1.019927  | 0.878267  |
| 30               | 1                | 0              | -4.086254               | 1.019947  | -0.878245 |
| 31               | 1                | 0              | -5.368615               | -1.141646 | -0.877580 |
| 32               | 1                | 0              | -5.368617               | -1.141669 | 0.877547  |
| 33               | 1                | 0              | -7.542978               | -0.261392 | -0.000010 |
| 34               | 1                | 0              | -6.691499               | 1.012535  | 0.883993  |
| 35               | 1                | 0              | -6.691495               | 1.012563  | -0.883969 |

**Table.3** Cartesian coordinates of the photolysis product aldehyde derivatives (optimized at the B3LYP/6-31G(d,p) level in acetonitrile using the PCM solvent model).

| Center Number | Atomic Number | Atomic Type | Coordinates (Angstroms) |           |           |
|---------------|---------------|-------------|-------------------------|-----------|-----------|
|               |               |             | X                       | Y         | Z         |
| 1             | 6             | 0           | 1.564141                | -2.559724 | 0.000003  |
| 2             | 6             | 0           | 2.835584                | -3.121273 | 0.000000  |
| 3             | 6             | 0           | 3.747584                | -2.057127 | -0.000002 |
| 4             | 6             | 0           | 3.020921                | -0.856346 | -0.000001 |
| 5             | 7             | 0           | 1.666120                | -1.199636 | 0.000002  |
| 6             | 6             | 0           | 3.605577                | 0.446189  | -0.000003 |
| 7             | 6             | 0           | 3.077007                | 1.703568  | 0.000000  |
| 8             | 6             | 0           | 3.966729                | 2.847199  | -0.000002 |
| 9             | 8             | 0           | 3.608120                | 4.023465  | 0.000002  |
| 10            | 6             | 0           | 0.541897                | -0.251353 | 0.000002  |
| 11            | 6             | 0           | -0.837029               | -0.908761 | 0.000001  |
| 12            | 6             | 0           | -1.953760               | 0.144506  | 0.000001  |
| 13            | 6             | 0           | -3.357562               | -0.472711 | -0.000001 |
| 14            | 6             | 0           | -4.480097               | 0.571877  | 0.000001  |
| 15            | 6             | 0           | -5.886106               | -0.040610 | -0.000003 |
| 16            | 6             | 0           | -7.002171               | 1.008458  | 0.000000  |
| 17            | 1             | 0           | 0.602742                | -3.047361 | 0.000005  |
| 18            | 1             | 0           | 3.054557                | -4.179346 | 0.000001  |
| 19            | 1             | 0           | 4.827765                | -2.115941 | -0.000004 |
| 20            | 1             | 0           | 4.695145                | 0.395451  | -0.000007 |
| 21            | 1             | 0           | 2.015011                | 1.914849  | 0.000005  |
| 22            | 1             | 0           | 5.050186                | 2.591928  | -0.000005 |
| 23            | 1             | 0           | 0.638811                | 0.389096  | 0.883123  |
| 24            | 1             | 0           | 0.638812                | 0.389098  | -0.883117 |
| 25            | 1             | 0           | -0.943704               | -1.551020 | -0.882543 |
| 26            | 1             | 0           | -0.943705               | -1.551020 | 0.882544  |
| 27            | 1             | 0           | -1.842016               | 0.793933  | 0.878908  |
| 28            | 1             | 0           | -1.842015               | 0.793935  | -0.878905 |
| 29            | 1             | 0           | -3.467130               | -1.124016 | -0.878476 |
| 30            | 1             | 0           | -3.467131               | -1.124020 | 0.878470  |
| 31            | 1             | 0           | -4.369621               | 1.223950  | 0.878248  |
| 32            | 1             | 0           | -4.369619               | 1.223956  | -0.878242 |
| 33            | 1             | 0           | -5.996138               | -0.692150 | -0.877582 |
| 34            | 1             | 0           | -5.996140               | -0.692157 | 0.877571  |
| 35            | 1             | 0           | -7.992053               | 0.540345  | -0.000003 |
| 36            | 1             | 0           | -6.938927               | 1.653430  | 0.883973  |
| 37            | 1             | 0           | -6.938925               | 1.653438  | -0.883967 |
